# Supplementary material for: Intestinal inflammation modulates the expression of ACE2 and TMPRSS2 and potentially overlaps with the pathogenesis of SARS-CoV-2 related disease
Source: bioRxiv or medRxiv preprint supplement (doi:10.1101/2020.05.21.109124), 2020-09-09
Supplement: Supplementary file [file media-4.pdf]

Supplementary Figure 4



|                                            | Ileum      |            | Colon/rectum |            |
|--------------------------------------------|------------|------------|--------------|------------|
|                                            | ACE2       | TMPRSS2    | ACE2         | TMPRSS2    |
| Age (younger → older)                      | ↔          | ↑ Inf      | ↑ Non.I      | ↓ Inf      |
| Gender (females vs males)                  | ↔          | ↔          | ↑            | ↔          |
| Inflamed vs NonInflamed (MSCCR)            | ↓          | ↑          | ↑            | ↑          |
| Inflamed vs NonInflamed (RISK)             | ↓          | ↔          | not tested   | not tested |
| Inflamed vs NonInflamed (CERTIFI)          | ↓          | ↔          | ↑            | ↓          |
| Corticosteroid (yes vs no)                 | ↔          | ↔          | ↓ Inf        | ↓ Inf      |
| 5-ASA (yes vs no)                          | ↔          | ↔          | ↔            | ↓ Inf      |
| Immunomodulator (yes vs no)                | ↔          | ↔          | ↓ Non.I      | ↓ Inf      |
| anti-TNF (MSCCR yes vs no)                 | ↔          | ↔          | ↑ Inf        | ↑ Inf      |
| Infliximab (Tx vs baseline in R)           | not tested | not tested | ↓            | ↔          |
| Vedolizumab (GEMINI:Tx vs baseline in R)   | not tested | not tested | ↓            | ↔          |
| Ustekinumab (CERTIFI: Tx vs baseline in R) | ↔          | ↔          | ↑ Inf        | ↑ Inf      |

↔ No Significant effect  
 ↑↑ Increased Expression  
 ↓↓ Decreased Expression
