# Supplementary material for: Intestinal inflammation modulates the expression of ACE2 and TMPRSS2 and potentially overlaps with the pathogenesis of SARS-CoV-2 related disease
Source: bioRxiv or medRxiv preprint supplement (doi:10.1101/2020.05.21.109124), 2020-09-09

# Supplementary Figure 5

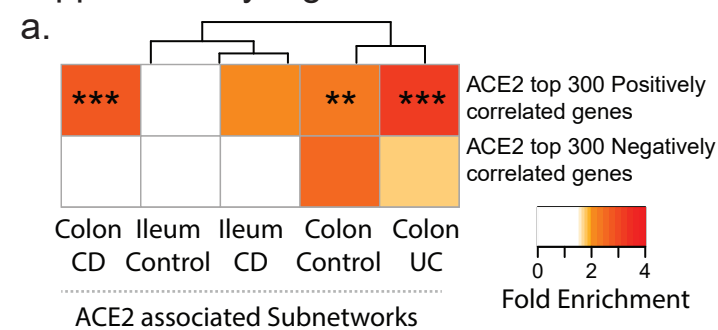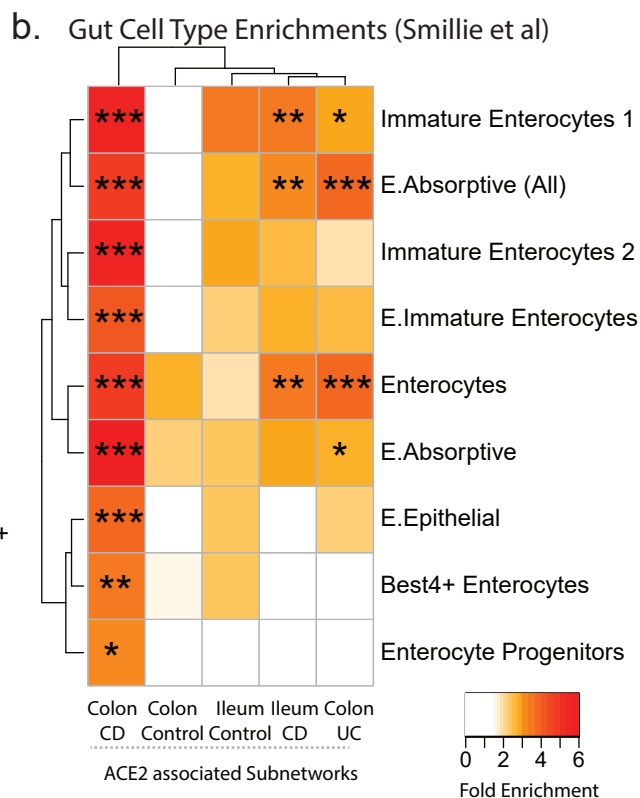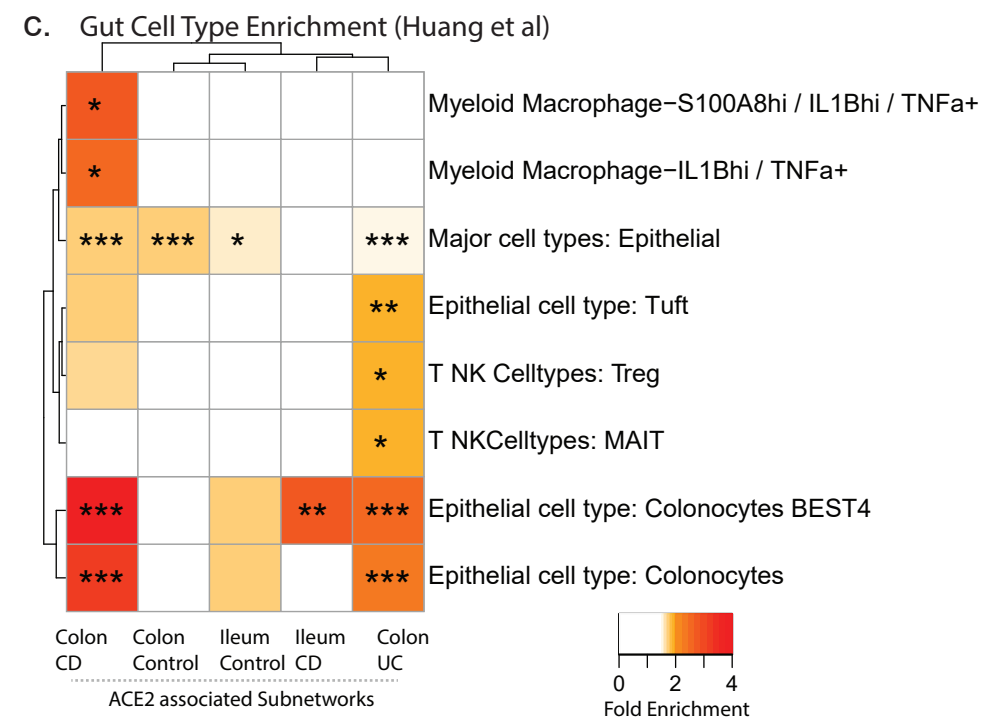

**d. Macrophage perturbation Differential Expression Signatures (Xue et al)**

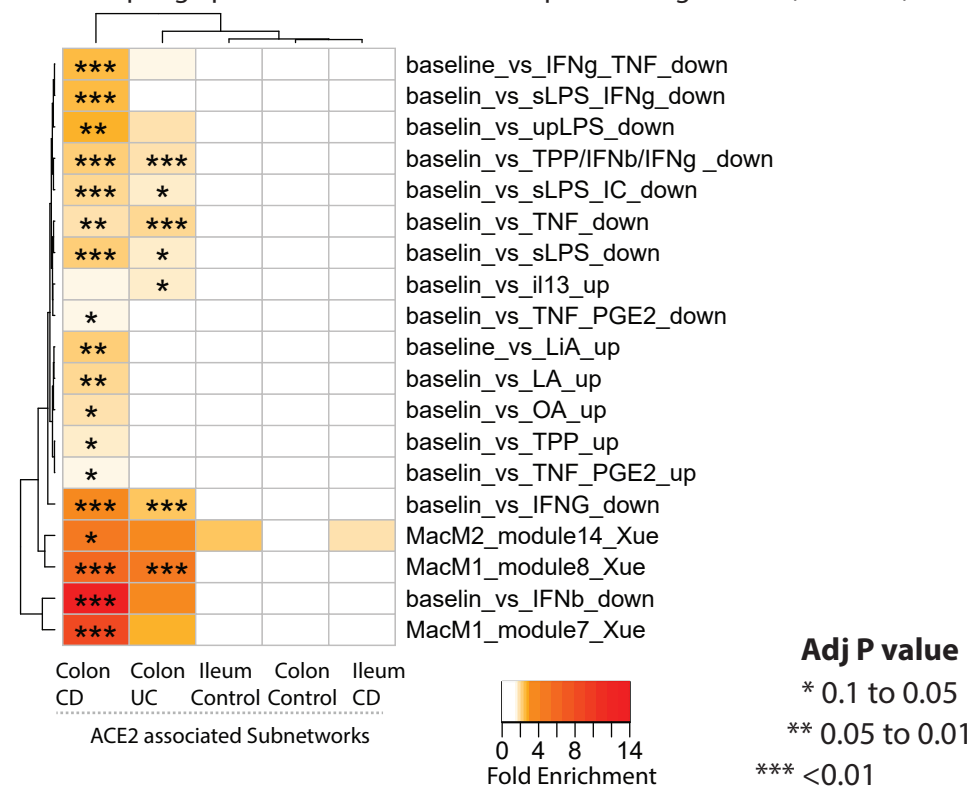

Supplement: Supplementary file [file media-5.pdf]
