# Supplementary material for: Intestinal inflammation modulates the expression of ACE2 and TMPRSS2 and potentially overlaps with the pathogenesis of SARS-CoV-2 related disease
Source: bioRxiv or medRxiv preprint supplement (doi:10.1101/2020.05.21.109124), 2020-09-09
Supplement: Supplementary file [file media-6.pdf]

# Supplementary Figure 6

a. Colon UC BGRN

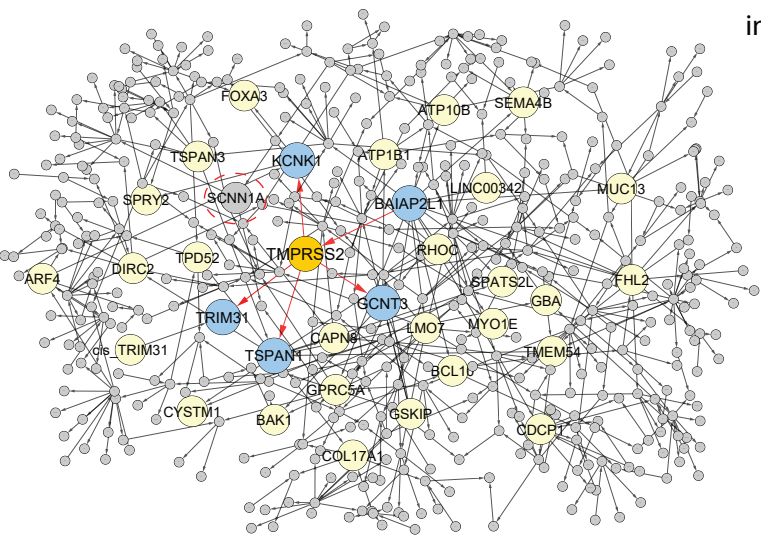

- TMPRSS2
- Plus 1 layer
- Plus 2 layer
- Plus 3/4 layer

b. TMPRSS2 associated genes in 4 of 4 subnetworks (1 ileum + 3 colon)

|          |
|----------|
| BAIAP2L1 |
| BCL10    |
| CAPN5    |
| DSC2     |
| ELF3     |
| EPHA2    |
| F11R     |
| GCNT3    |
| GPD2     |
| GSKIP    |
| HN1      |
| MYO1E    |
| OAS1     |
| RIOK3    |
| SLC44A4  |
| SSFA2    |
| TMPRSS2  |
| TRIM31   |

c.

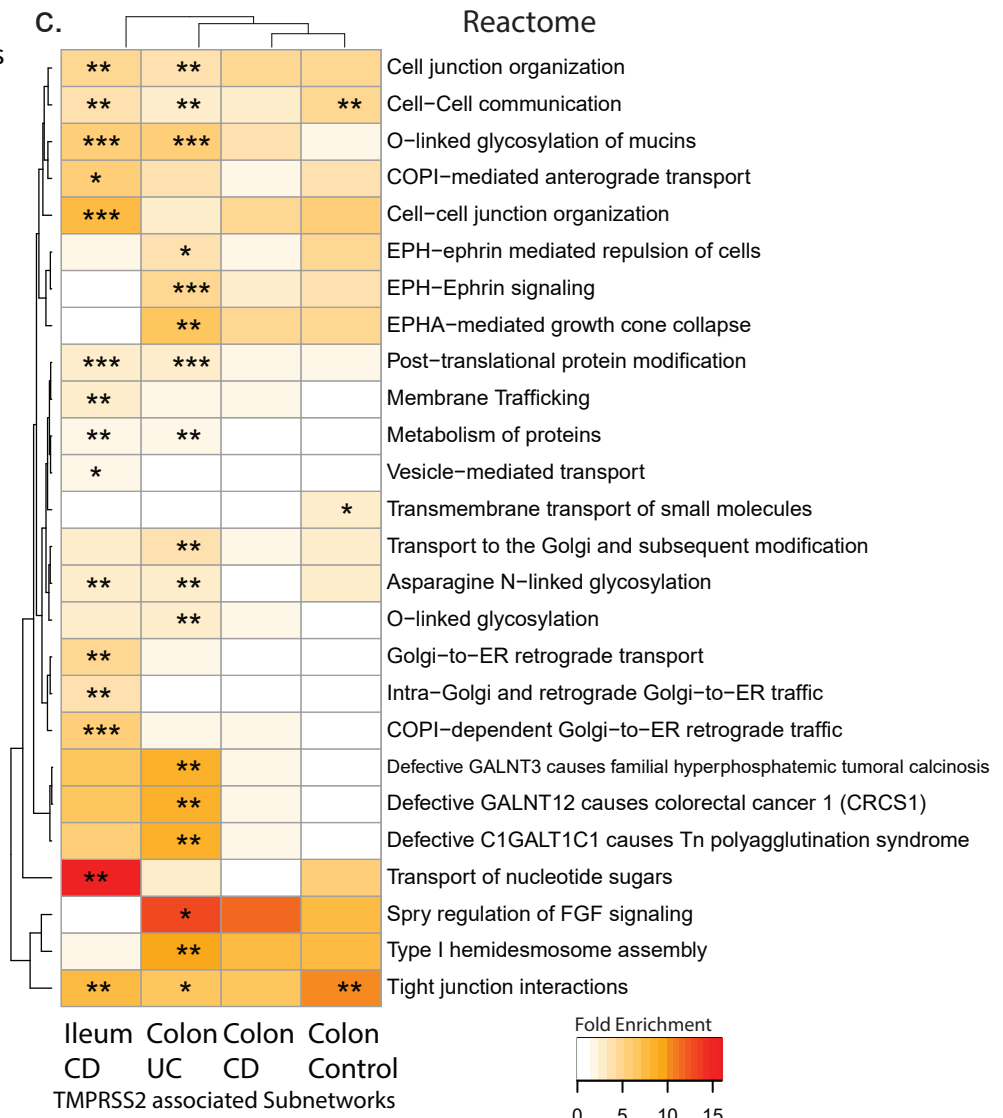

Adj P Value \* = 0.1 -0.05, \*\*=0.05-0.01, \*\*\*<0.01
