# Supplementary material for: Intestinal inflammation modulates the expression of ACE2 and TMPRSS2 and potentially overlaps with the pathogenesis of SARS-CoV-2 related disease
Source: bioRxiv or medRxiv preprint supplement (doi:10.1101/2020.05.21.109124), 2020-09-09
Supplement: Supplementary file [file media-9.pdf]

# Supplementary Figure 9

a. hSIO\_DIF\_COVID-19 Upregulated genes (adj p <0.10) (GSVA)

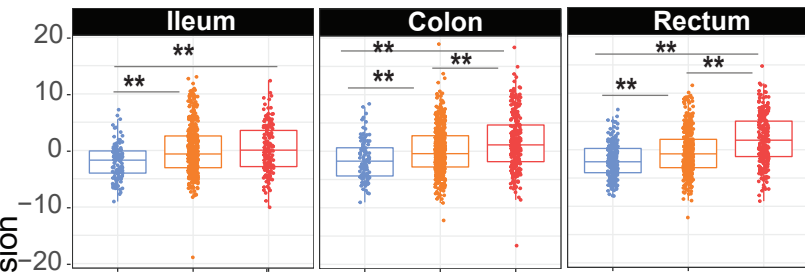

b. hSIO\_EXP\_COVID-UPregulated genes (adj p <0.10) (GSVA)

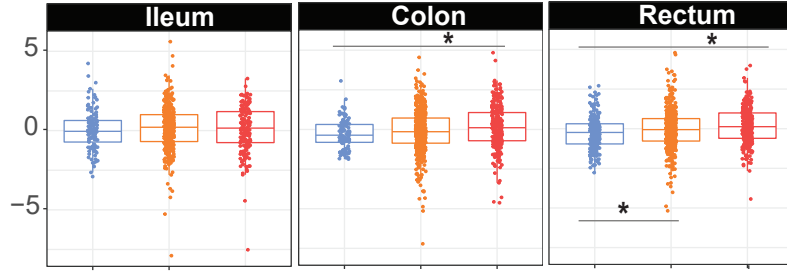

hSIO\_DIF\_COVID-Downregulated genes (adj p <0.10) (GSVA)

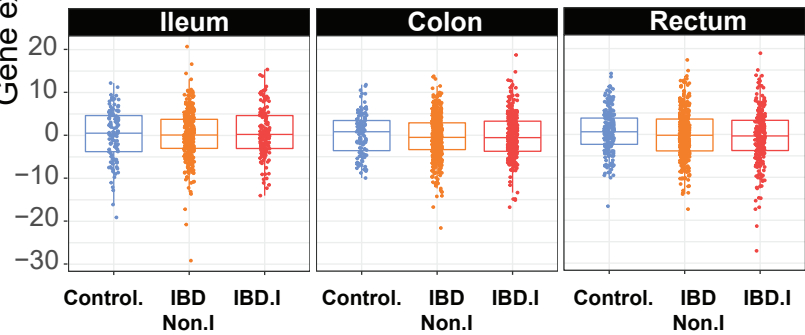

hSIO\_EXP\_COVID-Downregulated genes (adj p <0.10) (GSVA)

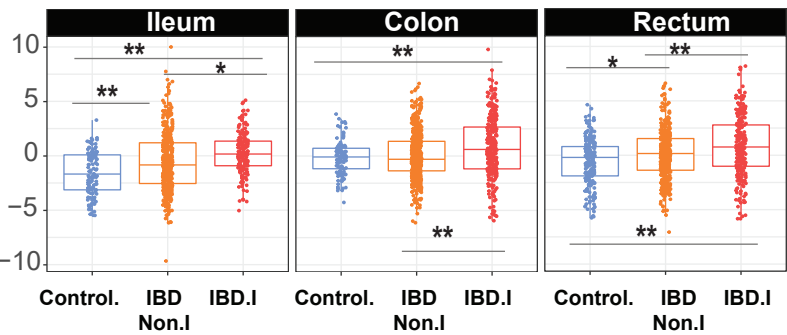

Legend: Controls IBD: non-inflamed IBD: inflamed \*p<0.05 \*\* p<0.001

c.

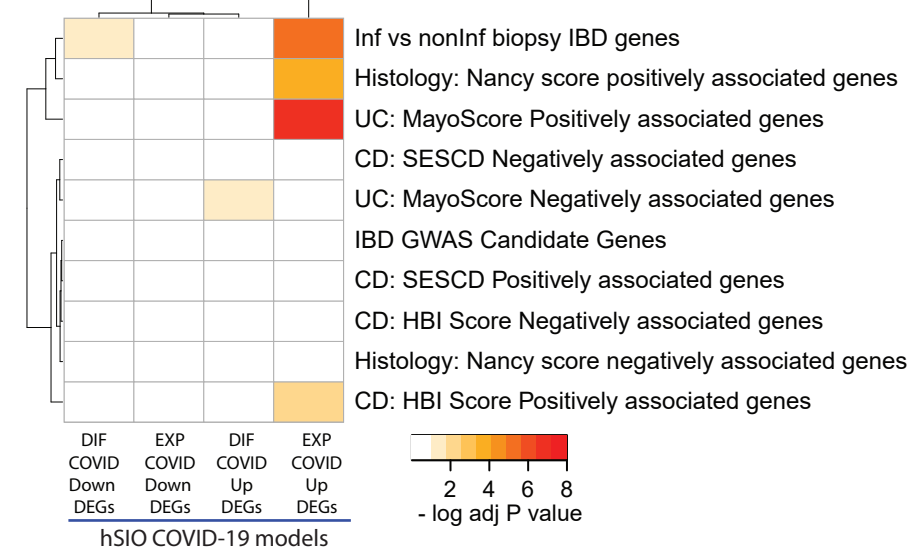

d.

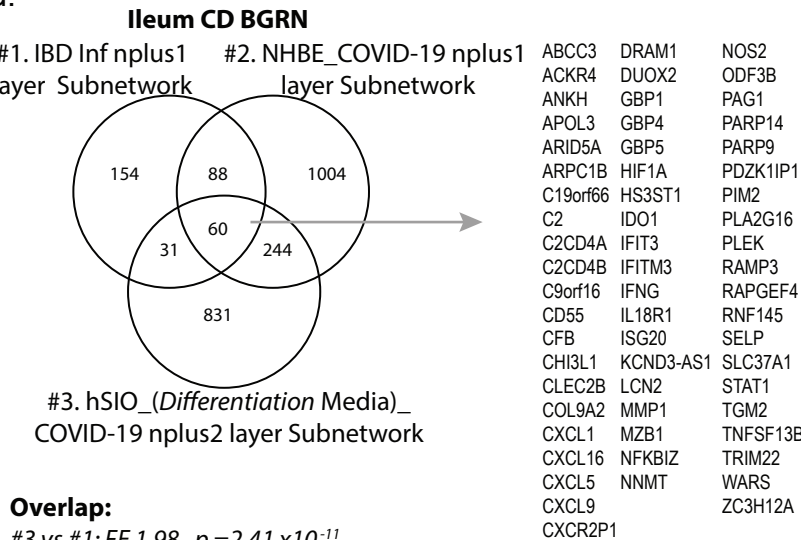

**Overlap:**

#3 vs #1: FE 1.98,  $p=2.41 \times 10^{-11}$

#2 vs #3: FE 1.6,  $p=1.65 \times 10^{-19}$

#1/2 intersect (148 genes) vs #3/#1 intersect (91 genes): FE 37.6,  $p=2.3 \times 10^{-87}$

e.

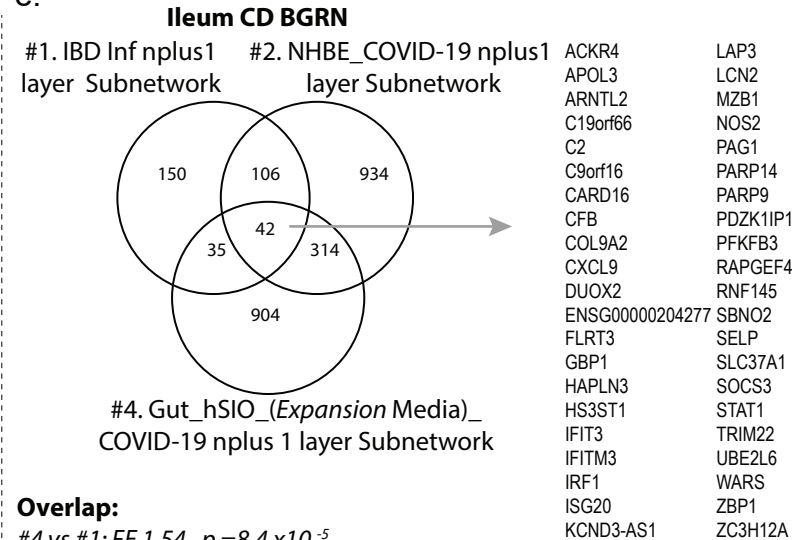

**Overlap:**

#4 vs #1: FE 1.54,  $p=8.4 \times 10^{-5}$

#2 vs #4: FE 1.67,  $p=5.8 \times 10^{-28}$

#1/#2 intersect (148 genes) vs #4/#1 intersect (77 genes): FE 31.0,  $p=3.67 \times 10^{-55}$
